# Supplementary material for: Host-diet-gut microbiome interactions influence human energy balance: a randomized clinical trial
Source: PubMed Central journal article supplement (PMC10232526; doi:10.1038/s41467-023-38778-x), 2023-05-31
Supplement: 41467_2023_38778_MOESM1_ESM.pdf [file 41467_2023_38778_MOESM1_ESM.pdf]

1 **Supplementary Materials**

2 **Host-Diet-Gut Microbiome Interactions Influence Human Energy Balance: a Randomized Clinical Trial**

3 Karen D. Corbin<sup>1</sup>, Elvis A. Carnero<sup>1</sup>, Blake Dirks<sup>2,3</sup>, Daria Igudesman<sup>1</sup>, Fanchao Yi<sup>1</sup>, Andrew Marcus<sup>2,5</sup>, Taylor  
4 L. Davis<sup>2,3</sup>, Richard E. Pratley<sup>1</sup>, Bruce E. Rittmann<sup>3,4</sup>, Rosa Krajmalnik-Brown<sup>\*2,4</sup>, Steven R. Smith<sup>\*1</sup>

5  
6 <sup>1</sup>AdventHealth Translational Research Institute, Orlando, Florida

7 <sup>2</sup>Biodesign Center for Health through Microbiomes, Arizona State University, Tempe, AZ

8 <sup>3</sup>Biodesign Swette Center for Environmental Biotechnology, Arizona State University, Tempe, AZ

9 <sup>4</sup>School of Sustainable Engineering and the Built Environment, Arizona State University, Tempe, AZ

10 <sup>5</sup>Skyology Inc, San Francisco, CA

11

12

13

14

15 **Supplementary Tables**16 **Supplementary Table 1: Dietary Intake Over 8 Inpatient Days**

| <b>Nutrient</b>                           | <b>Target</b>                           | <b>Western Diet</b> | <b>Microbiome Enhancer Diet</b> |
|-------------------------------------------|-----------------------------------------|---------------------|---------------------------------|
| Energy Intake (kcal/8 days)               | Equivalence                             | 17,008 ± 683        | 16,909 ± 700                    |
| Carbohydrates (%)                         | 47-52%                                  | 47.91 ± 0.02%       | 49.18 ± 0.06 %                  |
| Fat (%)                                   | 32-37%                                  | 35.19 ± 0.01%       | 34.43 ± 0.04%                   |
| Protein (%)                               | 15-18%                                  | 16.29 ± 0.009%      | 17.27 ± 0.03%                   |
| Fiber (g/1000 kcal)                       | 6-10g/1000 kcal vs.<br>23-30g/1000 kcal | 6.4 ± 0.02          | 26.0 ± 0.06                     |
| Resistant Starch, Estimated (g/1000 kcal) | <2g/1000 kcal vs.<br>>8g/1000 kcals     | 1.2 ± 0             | 10.3 ± 0                        |

17

18 Intake was evaluated by comparing the nutritional composition data from our menu design software to the  
19 amount of the provided diet consumed by each participant over the 8 inpatient days when all 3 meals were  
20 consumed on our metabolic ward and no modifications to the diets were made for enteroendocrine or food  
21 intake testing. Macronutrient content was based on a calculation that uses estimated average energy per gram of  
22 carbohydrate, protein, and fat. The total percentage of macronutrients approximates 100%. As a comprehensive  
23 database of resistant starch content of foods does not exist, the contributions for resistant starch were estimated  
24 based on published amounts of resistant starch in the foods provided<sup>1</sup>. Data reported as mean ± s.e.m.

25

26

27 **Supplementary Table 2: Whole Room Calorimetry Schedule**

| <b>Clock Time: Start</b> | <b>Clock Time: End</b> | <b>Activity</b>                                                                                                                                            |
|--------------------------|------------------------|------------------------------------------------------------------------------------------------------------------------------------------------------------|
| 0800                     | 0900                   | Participant to enter Calorimeter. Instruct to sit on bed supported by 30° wedge, feet in bed quietly and awake (NO TV/phone) x 1 hour. <b>No Restroom.</b> |
| 0900                     | 0930                   | Serve Breakfast. Participant to sit at desk. Eat 100 % in 30 min. (On scheduled day, instruct participant to ingest SmartPill after breakfast)             |
| 0930                     | 1230                   | Participant in bed quietly (TV/phone ok) x 3 hours.<br><b>No Restroom.</b>                                                                                 |
| 1230                     | 1245                   | Participant to get ready for exercise. Use restroom.                                                                                                       |
| 1245                     | 1315                   | Participant to walk on treadmill for 30 minutes: 3 mph and 1% incline                                                                                      |
| 1315                     | 1330                   | Recovery time. May use restroom.                                                                                                                           |
| 1330                     | 1400                   | Desk time for 30 min                                                                                                                                       |
| 1400                     | 1430                   | Serve Lunch. Participant to sit at desk. Eat 100% in 30 min.                                                                                               |
| 1430                     | 1600                   | Participant in bed quietly (TV/phone ok) x 1.5 hours.                                                                                                      |
| 1600                     | 1615                   | Participant to get ready for exercise. Use restroom                                                                                                        |
| 1615                     | 1645                   | Participant to walk on Treadmill x 30 minutes: 3 mph and 1% incline.                                                                                       |
| 1645                     | 1700                   | Recovery time. May use restroom.                                                                                                                           |
| 1700                     | 1800                   | Desk time for 1 hour                                                                                                                                       |
| 1800                     | 1830                   | Serve Dinner. Participant to sit at desk. Eat 100 % in 30 min.                                                                                             |
| 1830                     | 2000                   | Participant in bed quietly (TV/phone ok) x 1.5 hours.                                                                                                      |
| 2000                     | 2200                   | Free Time x 2 hours.                                                                                                                                       |
| 2200                     | 0600                   | Participant to empty bladder and collect urine prior to lights out. Curtains must be closed.                                                               |
| 0600                     | 0700                   | Awaken participant. May empty bladder. Participant in bed quietly x 1 hour.                                                                                |
| 0700                     |                        | Participant to empty bladder, end of urine collection. Participant to exit Calorimeter.                                                                    |

28

29

**Supplementary Table 3: Differential Relative Abundance by Diet at the Phylum and Family Levels**

|                                          | <b>P Value</b> | <b>Q Value</b> |
|------------------------------------------|----------------|----------------|
| <b>Phylum Level</b>                      |                |                |
| Firmicutes                               | 0.041322       | 0.7438         |
| Actinobacteria                           | 0.36716        | 0.921388       |
| Proteobacteria                           | 0.591775       | 0.921388       |
| Bacteroidetes                            | 0.79006        | 0.94554        |
| Verrucomicrobia                          | 0.834099       | 0.94554        |
| Euryarchaeota                            | 0.95604        | 0.968383       |
| <b>Family Level</b>                      |                |                |
| Propionibacteriaceae                     | 0.00766        | 0.402172       |
| Oscillospiraceae                         | 0.004497       | 0.402172       |
| Actinomycetaceae                         | 0.036966       | 0.880546       |
| Clostridiales Family XIII Incertae Sedis | 0.092248       | 0.880546       |
| Acidaminococcaceae                       | 0.051117       | 0.880546       |
| Bifidobacteriaceae                       | 0.532114       | 0.969746       |
| Micrococcaceae                           | 0.733506       | 0.969746       |
| Atopobiaceae                             | 0.817563       | 0.969746       |
| Coriobacteriaceae                        | 0.725051       | 0.969746       |
| Eggerthellaceae                          | 0.368079       | 0.969746       |
| Bacteroidaceae                           | 0.617749       | 0.969746       |
| Barnesiellaceae                          | 0.679615       | 0.969746       |
| Odoribacteraceae                         | 0.120954       | 0.969746       |
| Prevotellaceae                           | 0.274396       | 0.969746       |
| Rikenellaceae                            | 0.844536       | 0.969746       |
| Tannerellaceae                           | 0.639694       | 0.969746       |
| Bacillales unclassified                  | 0.5078         | 0.969746       |
| Lactobacillaceae                         | 0.327826       | 0.969746       |
| Leuconostocaceae                         | 0.622826       | 0.969746       |
| Streptococcaceae                         | 0.524649       | 0.969746       |
| Catabacteriaceae                         | 0.278053       | 0.969746       |
| Christensenellaceae                      | 0.643426       | 0.969746       |
| Clostridiaceae                           | 0.669668       | 0.969746       |
| Clostridiales unclassified               | 0.639535       | 0.969746       |
| Eubacteriaceae                           | 0.539811       | 0.969746       |
| Lachnospiraceae                          | 0.528458       | 0.969746       |
| Peptostreptococcaceae                    | 0.647885       | 0.969746       |
| Ruminococcaceae                          | 0.152769       | 0.969746       |
| Erysipelotrichaceae                      | 0.415012       | 0.969746       |
| Firmicutes unclassified                  | 0.838296       | 0.969746       |
| Veillonellaceae                          | 0.292069       | 0.969746       |
| Akkermansiaceae                          | 0.83385        | 0.969746       |
| Desulfovibrionaceae                      | 0.887671       | 0.972355       |
| Methanobacteriaceae                      | 0.956145       | 0.984267       |
| Enterobacteriaceae                       | 0.943787       | 0.984267       |

Phylum and family level differential abundance by diet tested by Compound Poisson linear mixed model. P-values were corrected to produce Q values using the Benjamini-Hochberg method.

**Supplementary Fig. 1**

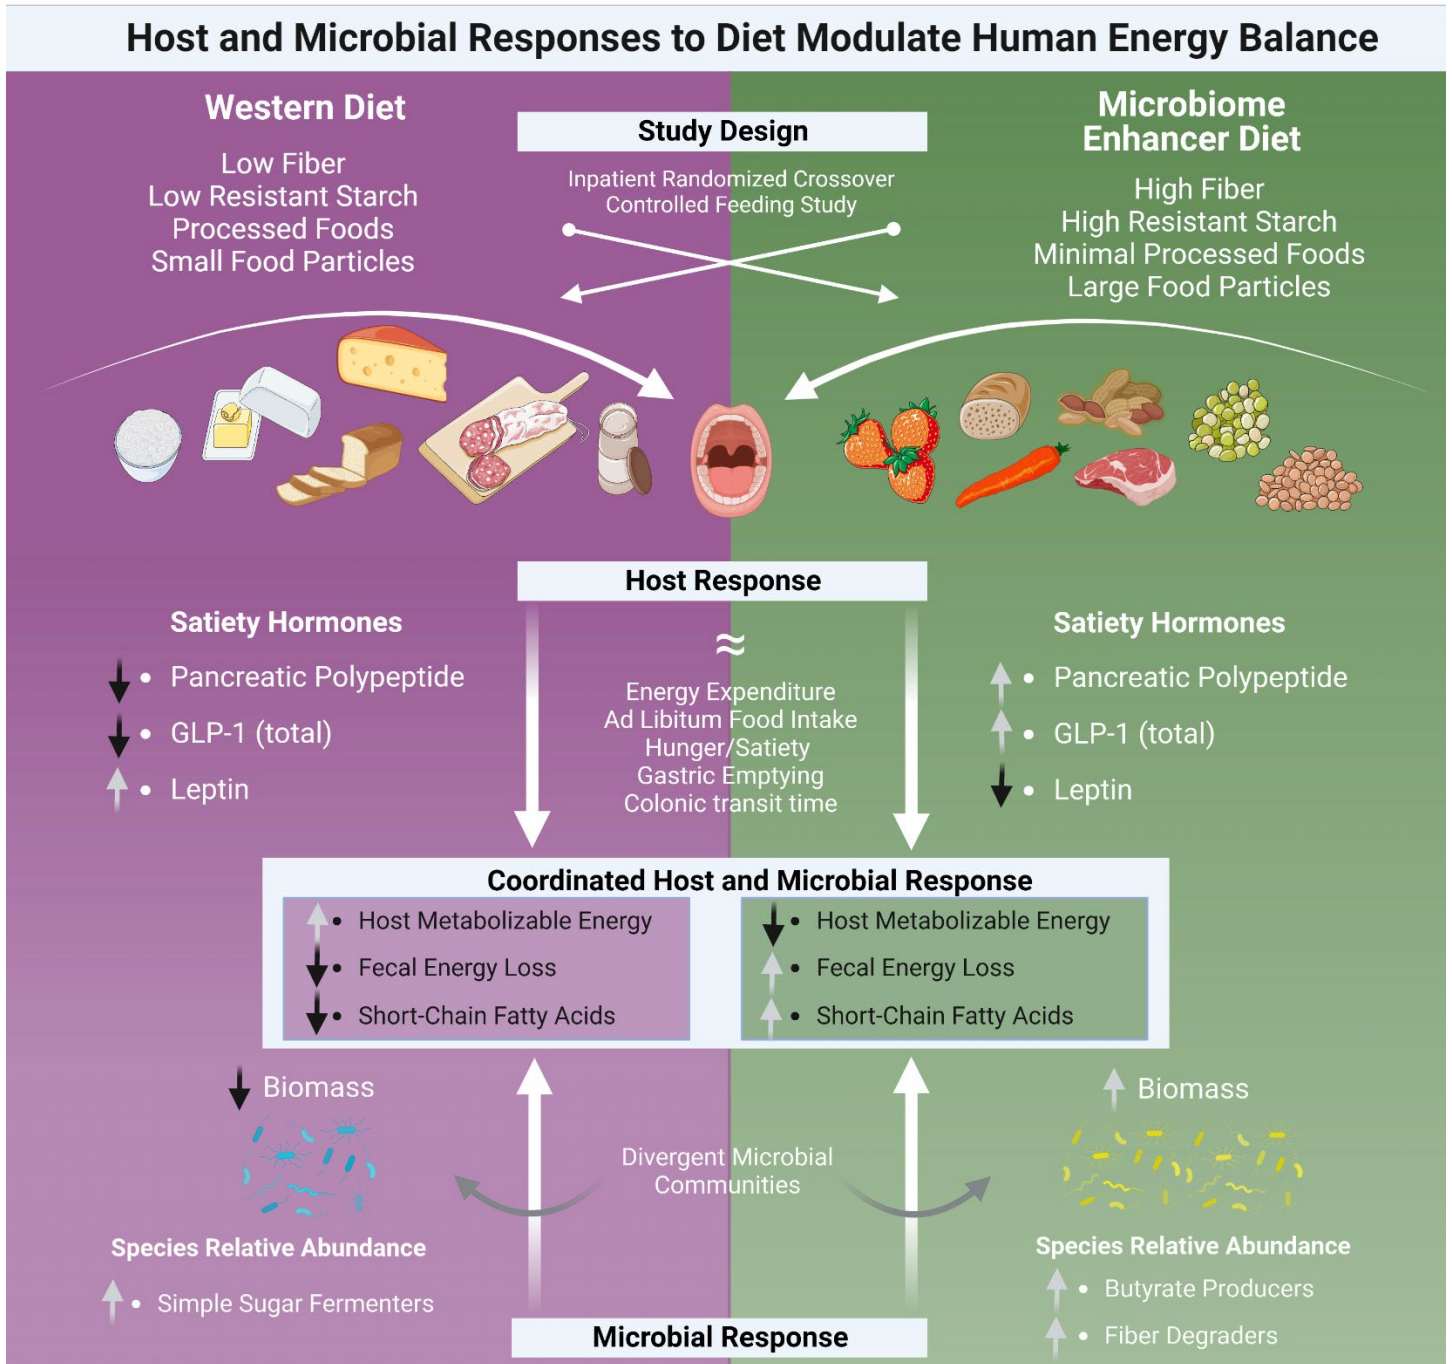

40 **Supplementary Fig. 1. Study design and main findings.** This schematic shows the key components of the  
41 study, measurement endpoints, and summarizes main findings. Created with BioRender.com.

Supplementary Fig. 2

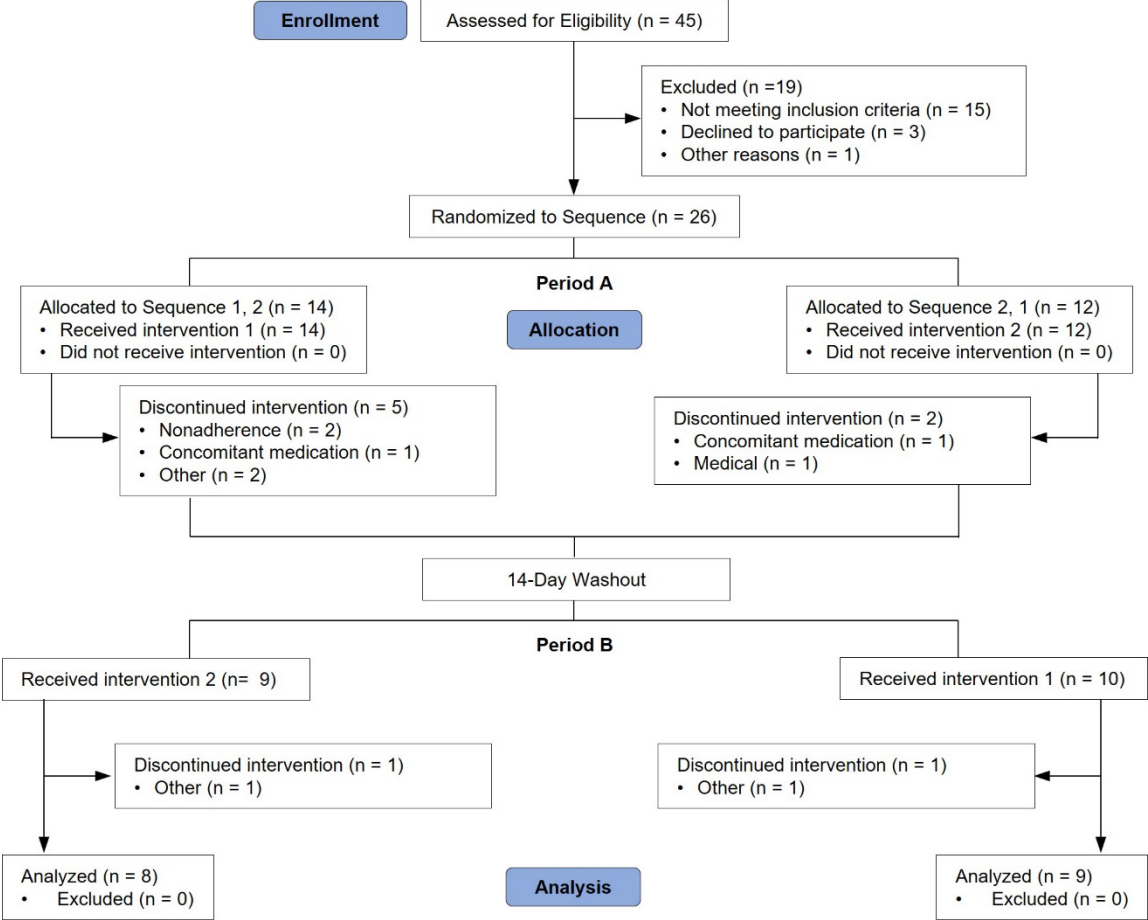

46 **Supplementary Fig. 2 CONSORT diagram.** This diagram shows the flow of participants from enrollment  
47 through analysis.

### Supplementary Fig. 3

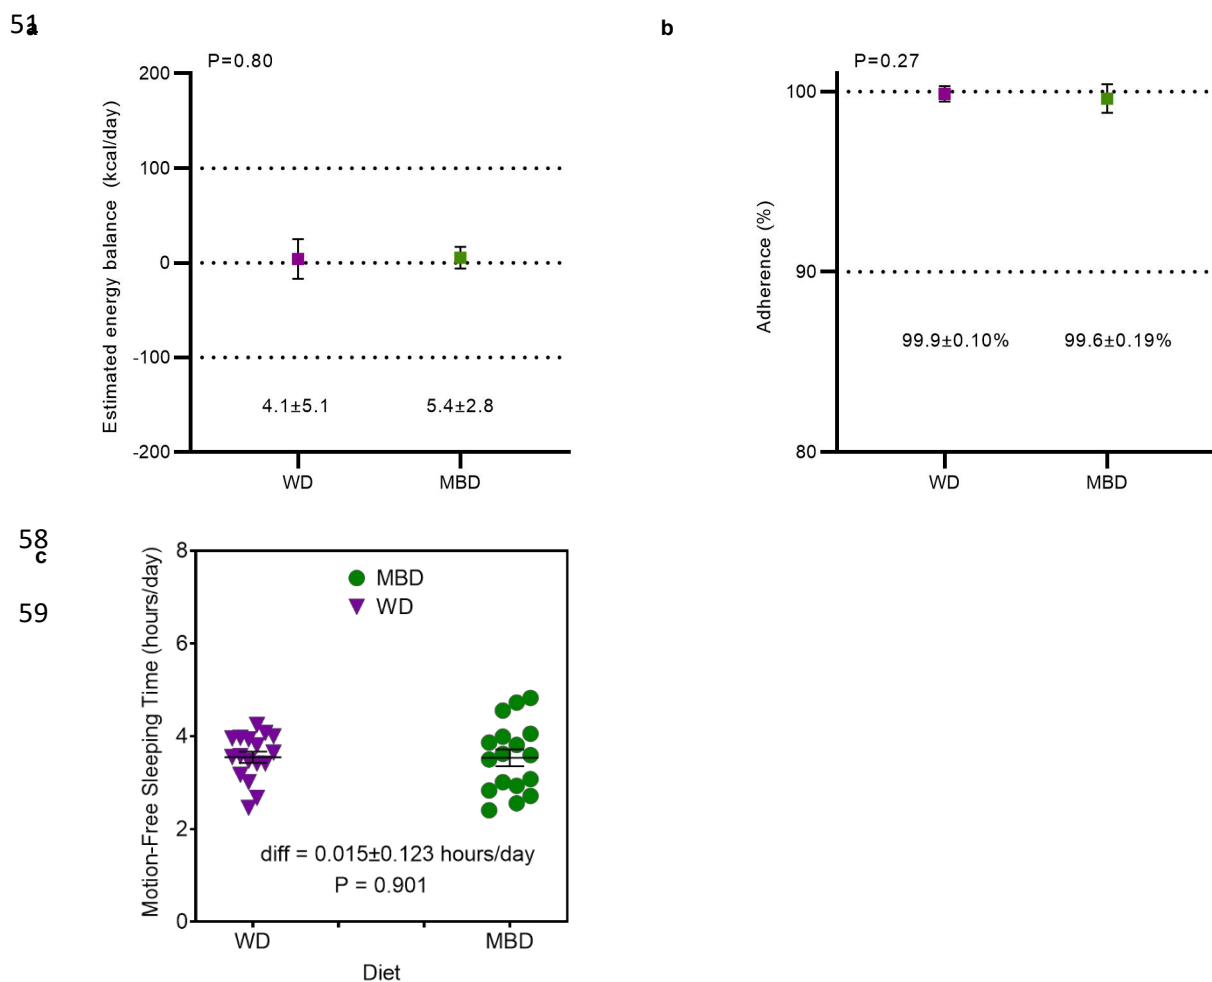

**Supplementary Fig. 3. Experimental paradigm components: adherence, energy balance and sleep. a,** Energy balance (mean of 6 measurement days) estimated from traditional parameters: Energy Balance = Energy Intake (kcal/24h) – Energy Expenditure (kcal/24h). **b,** Dietary adherence on the WD compared to the MBD over all inpatient days where all 3 meals were consumed on-site, and no changes were made to the feeding for testing. **c,** Motion-free sleeping time in hours (mean of 6 measurement days) calculated from the whole-room calorimeter radar sensor by removing all minutes with  $\geq 6$  counts of movement. N=17 per diet for both panels. Error bars in panels a and b are displayed as s.e.m. P values for panels a and b are from linear mixed effects regression models and denote the effect of diet (or lack thereof) on each endpoint. A paired sample t-test by diet was used to generate the P value in panel c. MBD—Microbiome Enhancer Diet (green); WD—Western Diet (purple).

77

78

### Supplementary Fig. 4

79

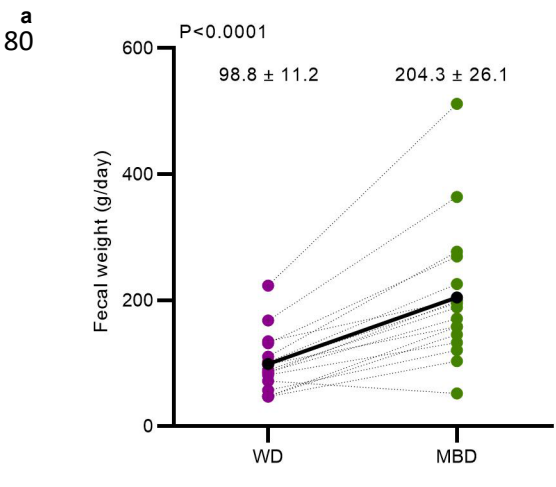

81

82

83

84

85

86

**b**

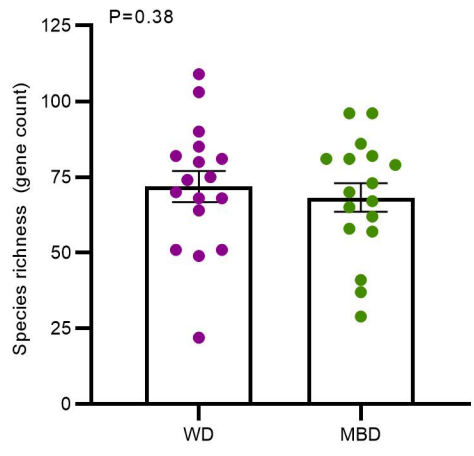

89

90

91

92

93

**c**

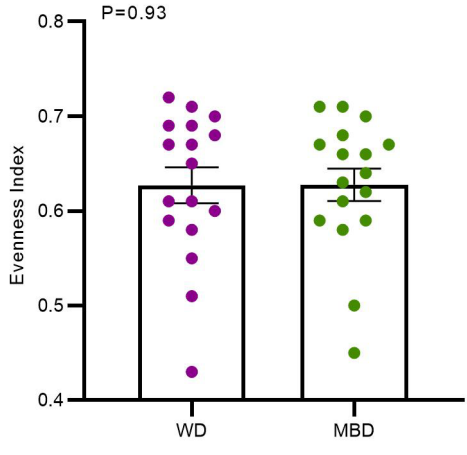

94

95

87

88

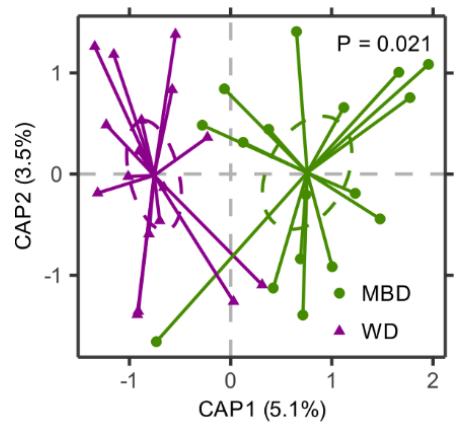

**Supplementary Fig. 4. Gut microbiome community structure.** **a**, Fecal weight from 6 days of composited feces averaged to generate daily production. Data reported as mean  $\pm$  s.e.m.  $P = 1.24 \times 10^{-5}$ . **b- c**, Alpha-diversity measures of richness and evenness. **d**, Beta-diversity at the species level assessed with Jaccard Similarity. Error bars in panels a and b are displayed as s.e.m. P values for panels a, b, and c are from linear mixed effects regression models and denote the effect of diet (or lack thereof) on each endpoint. P values for panel d are from permanova test and denote a statistically significant effect of diet on Jaccard Similarity metric. Confidence intervals for panel d are displayed as s.e.m. CAP—Canonical Analysis of Principal Coordinates; MBD—Microbiome Enhancer Diet (green); WD—Western Diet (purple).

104



Supplementary Fig. 5

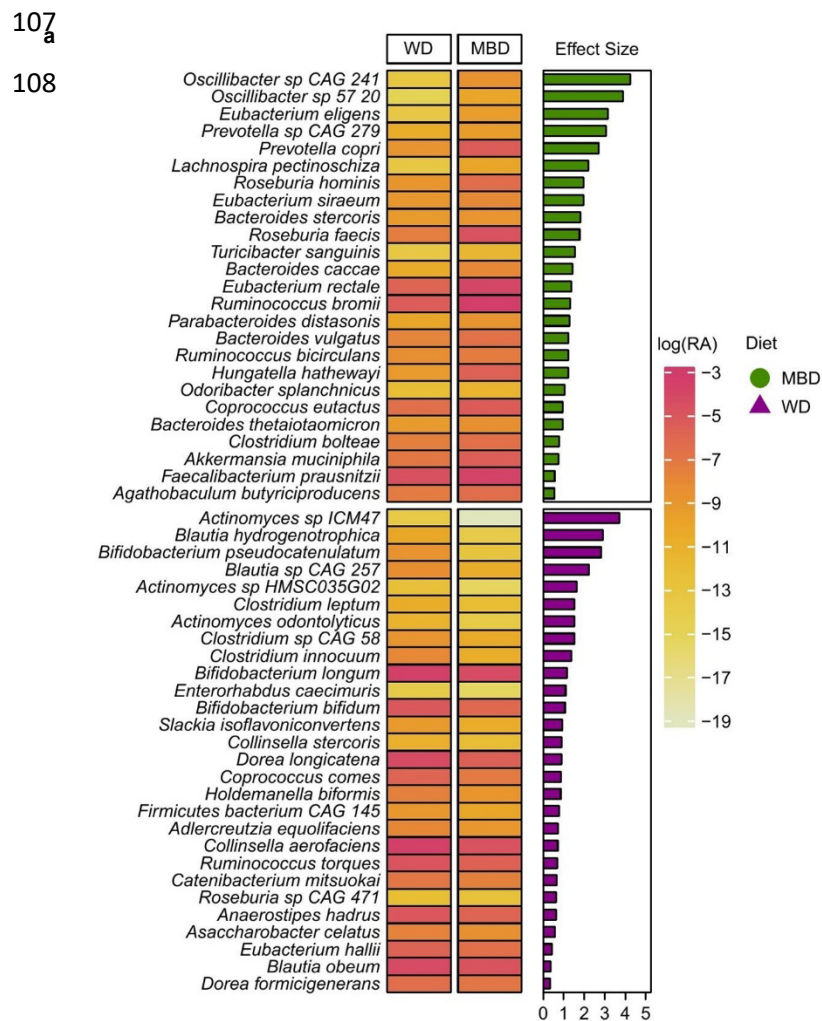

**b**

| Species                                  | Treatment | Q-value                |
|------------------------------------------|-----------|------------------------|
| <i>Oscillibacter</i> sp CAG 241          | MBD       | 0.01                   |
| <i>Oscillibacter</i> sp 57_20            | MBD       | $2.27 \times 10^{-07}$ |
| <i>Eubacterium eligens</i>               | MBD       | $7.44 \times 10^{-07}$ |
| <i>Prevotella</i> sp CAG 279             | MBD       | 0.0005                 |
| <i>Prevotella copri</i>                  | MBD       | $1.46 \times 10^{-06}$ |
| <i>Lachnospira pectinoschiza</i>         | MBD       | 0.001                  |
| <i>Roseburia hominis</i>                 | MBD       | 0.002                  |
| <i>Eubacterium siraeum</i>               | MBD       | 0.07                   |
| <i>Bacteroides stercoris</i>             | MBD       | 0.04                   |
| <i>Roseburia faecis</i>                  | MBD       | 0.001                  |
| <i>Turicibacter sanguinis</i>            | MBD       | 0.02                   |
| <i>Bacteroides caccae</i>                | MBD       | 0.02                   |
| <i>Eubacterium rectale</i>               | MBD       | 0.02                   |
| <i>Ruminococcus bromii</i>               | MBD       | 0.15                   |
| <i>Parabacteroides distasonis</i>        | MBD       | 0.03                   |
| <i>Bacteroides vulgatus</i>              | MBD       | 0.04                   |
| <i>Ruminococcus bicirculans</i>          | MBD       | 0.12                   |
| <i>Hungatella hathewayi</i>              | MBD       | 0.21                   |
| <i>Odoribacter splanchnicus</i>          | MBD       | 0.16                   |
| <i>Coprococcus eutactus</i>              | MBD       | 0.14                   |
| <i>Bacteroides thetaiotaomicron</i>      | MBD       | 0.22                   |
| <i>Clostridium bolteae</i>               | MBD       | $5.00 \times 10^{-10}$ |
| <i>Akkermansia muciniphila</i>           | MBD       | 0.02                   |
| <i>Faecalibacterium prausnitzii</i>      | MBD       | 0.14                   |
| <i>Agathobaculum butyriciproducens</i>   | MBD       | 0.11                   |
| <i>Dorea formicigenerans</i>             | WD        | 0.10                   |
| <i>Blautia obeum</i>                     | WD        | 0.14                   |
| <i>Eubacterium hallii</i>                | WD        | 0.14                   |
| <i>Asaccharobacter celatus</i>           | WD        | $5.04 \times 10^{-06}$ |
| <i>Anaerostipes hadrus</i>               | WD        | $4.37 \times 10^{-05}$ |
| <i>Roseburia</i> sp CAG 471              | WD        | 0.07                   |
| <i>Catenibacterium mitsuokai</i>         | WD        | 0.062                  |
| <i>Ruminococcus torques</i>              | WD        | 0.07                   |
| <i>Collinsella aerofaciens</i>           | WD        | 0.005                  |
| <i>Adlercreutzia equolifaciens</i>       | WD        | $5.68 \times 10^{-09}$ |
| <i>Firmicutes bacterium CAG_145</i>      | WD        | 0.0003                 |
| <i>Holdemanella biformis</i>             | WD        | 0.005                  |
| <i>Coprococcus comes</i>                 | WD        | $5.68 \times 10^{-09}$ |
| <i>Dorea longicatena</i>                 | WD        | $1.26 \times 10^{-05}$ |
| <i>Collinsella stercoris</i>             | WD        | 0.02                   |
| <i>Slackia isoflavoniconvertens</i>      | WD        | 0.002                  |
| <i>Bifidobacterium bifidum</i>           | WD        | 0.018                  |
| <i>Enterorhabdus caecimuris</i>          | WD        | $5.34 \times 10^{-06}$ |
| <i>Bifidobacterium longum</i>            | WD        | 0.0003                 |
| <i>Clostridium innocuum</i>              | WD        | 0.07                   |
| <i>Clostridium</i> sp CAG 58             | WD        | 0.07                   |
| <i>Actinomyces odontolyticus</i>         | WD        | 0.009                  |
| <i>Clostridium leptum</i>                | WD        | 0.02                   |
| <i>Actinomyces</i> sp_HMSC035G02         | WD        | 0.14                   |
| <i>Blautia</i> sp_CAG_257                | WD        | 0.001                  |
| <i>Bifidobacterium pseudocatenulatum</i> | WD        | $5.60 \times 10^{-05}$ |
| <i>Blautia hydrogenotrophica</i>         | WD        | 0.006                  |
| <i>Actinomyces</i> sp_ICM47              | WD        | 0.02                   |

**Supplementary Fig. 5. Gut microbiome remodeling in response to diet. a**, Mean relative abundances and effect sizes of significantly differentially abundant species between diets. The heatmap shows the mean natural-log-transformed relative abundance (MaAsLin2) of species that were significantly different by diet. The bar graph shows the effect size of the regression coefficient from compound poisson regression models comparing species relative abundance by diet. Species shown in this figure had  $P < 0.05$  and  $Q < 0.25$ . **b**, P-values were corrected to produce Q-values using the Benjamini-Hochberg method for each regression coefficient shown in **a**, which ranged from  $5 \times 10^{-10}$  to 0.217. The treatment indicates the diet on which the species relative abundance was higher. N=17 per diet for all panels. MBD—Microbiome Enhancer Diet; RA—relative abundance; WD—Western DietCAP—Canonical Analysis of Principal Coordinates; MBD—Microbiome Enhancer Diet (green); RA—relative abundance; WD—Western Diet (purple)

Supplementary Fig. 6

139  
a  
140

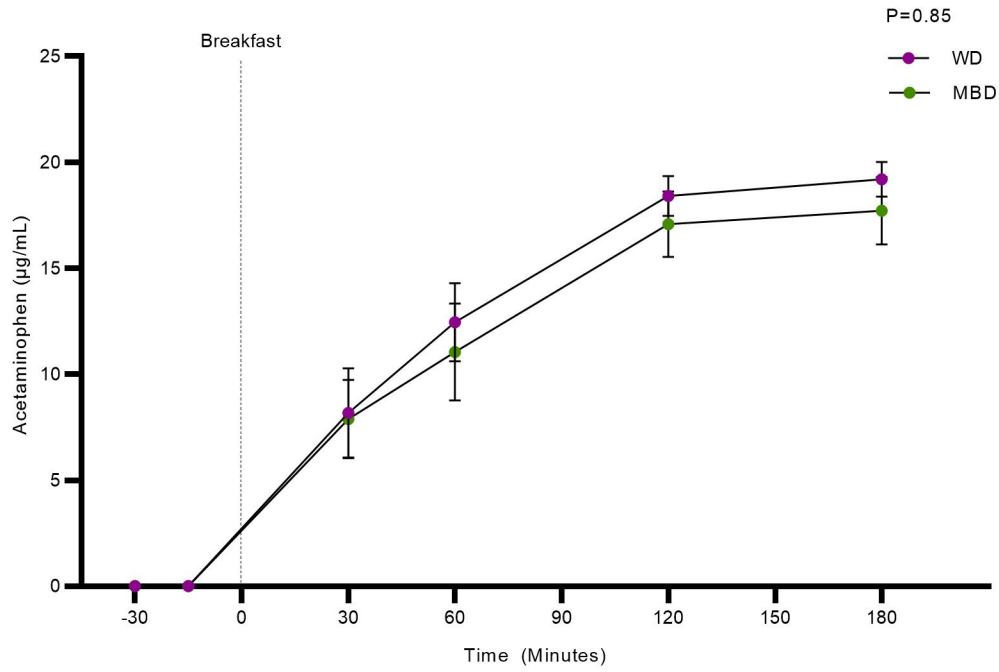

149

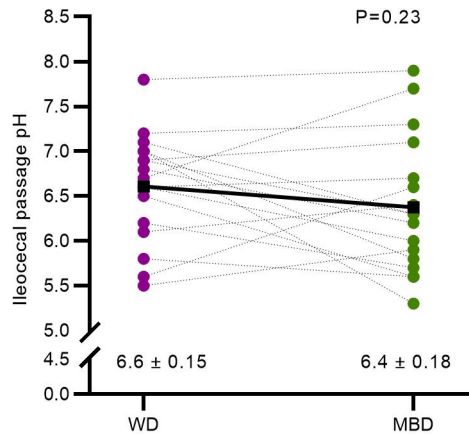

165

166

c

167

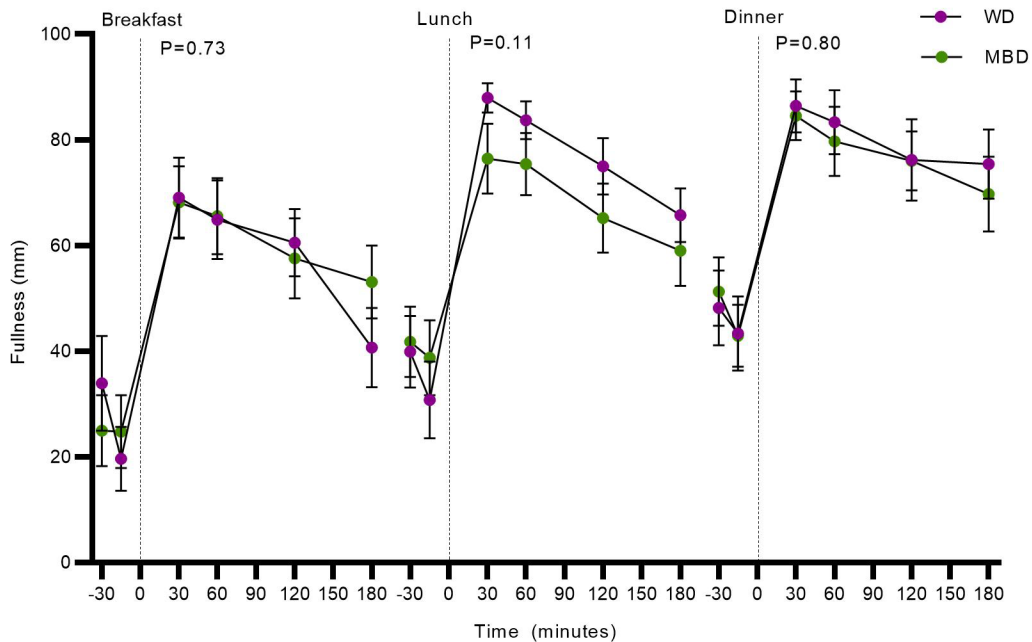

168

169

170

171

172

173

174

175

176

177

d

178

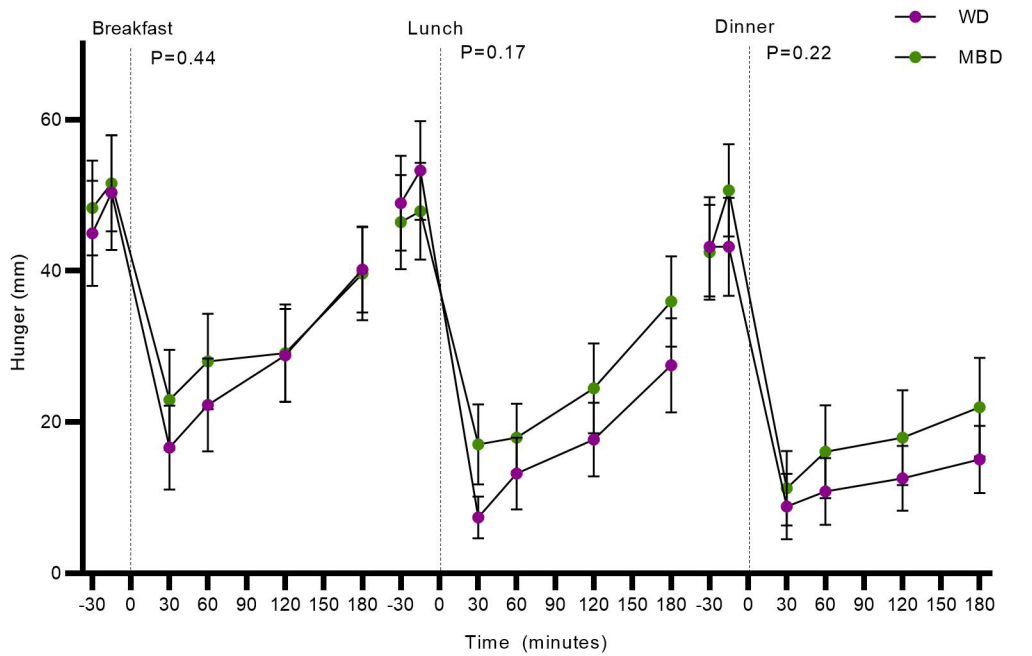

179

180

181

182

183

184

185

186

187

188

189

190

191

192

193

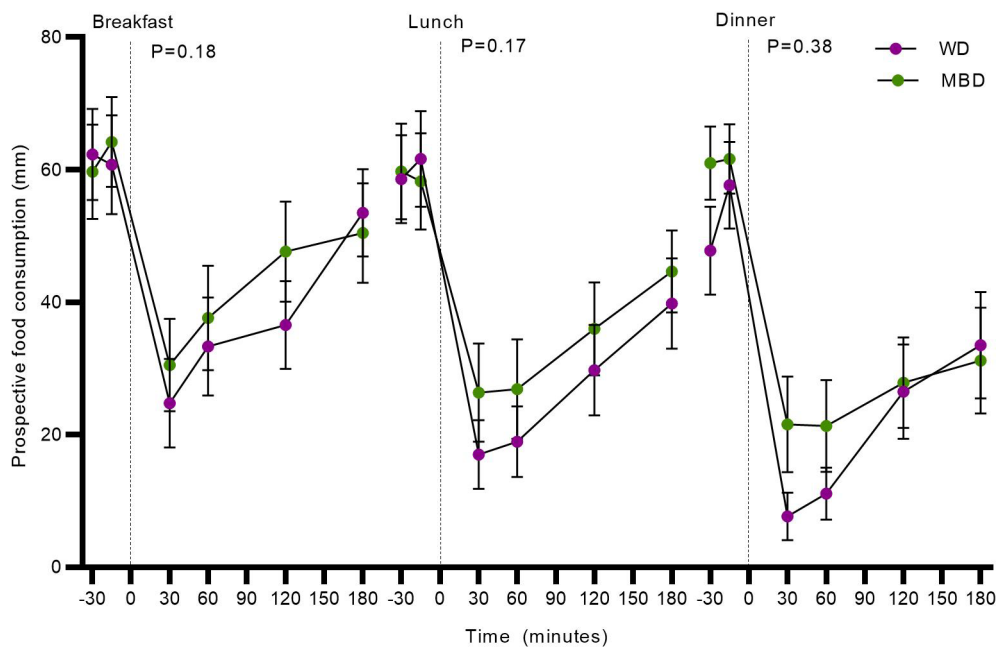

202

203

204

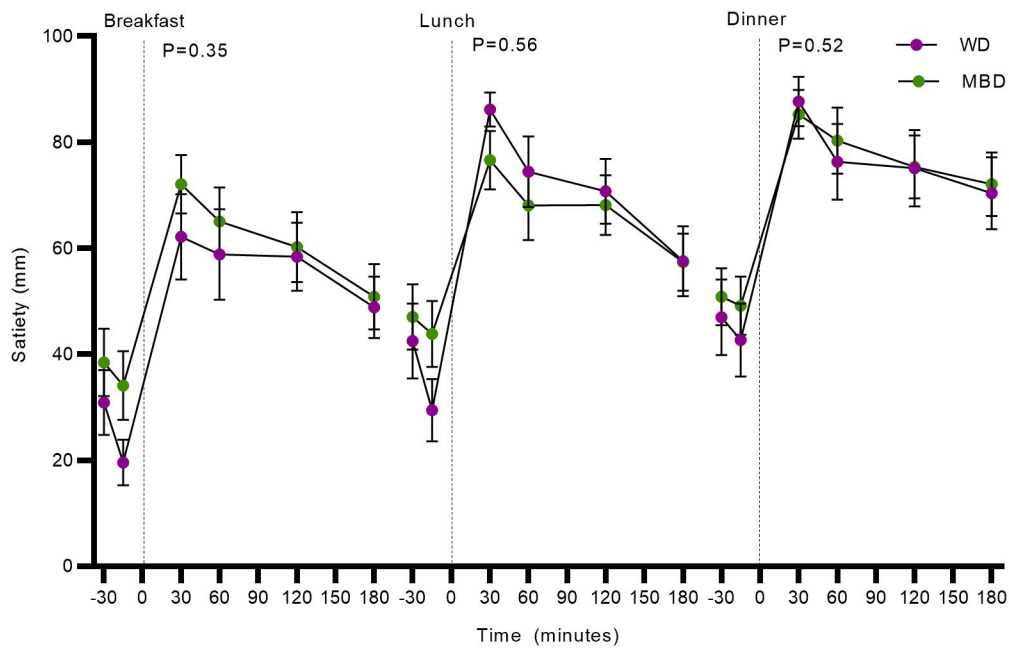

213

214

215

216

217

218

219

220

221

222

223

224

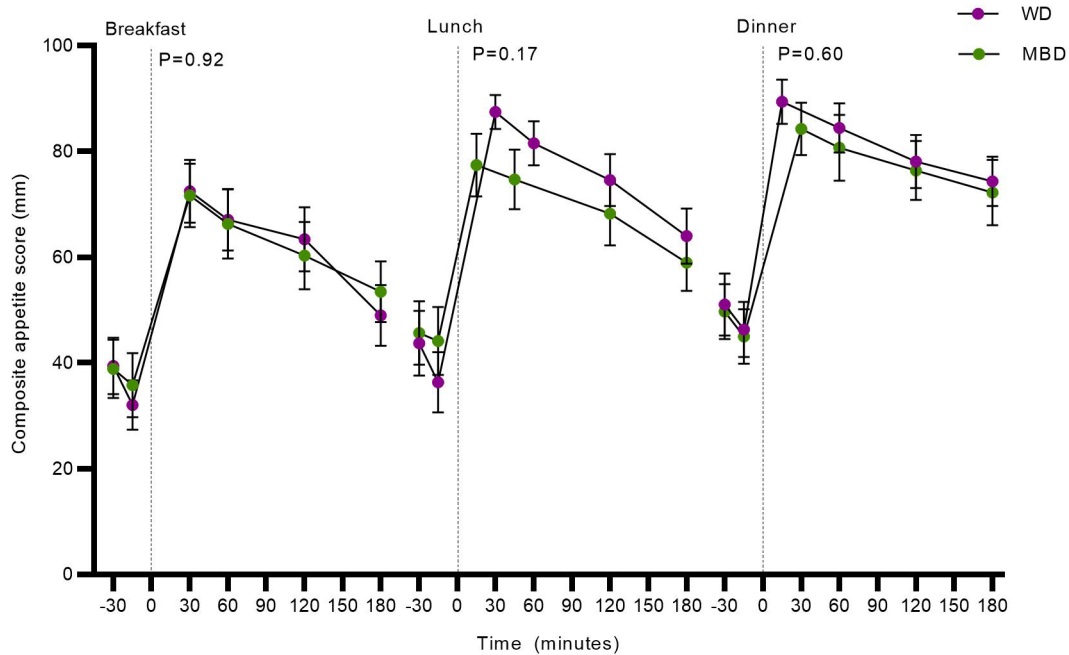

234

235

h

236

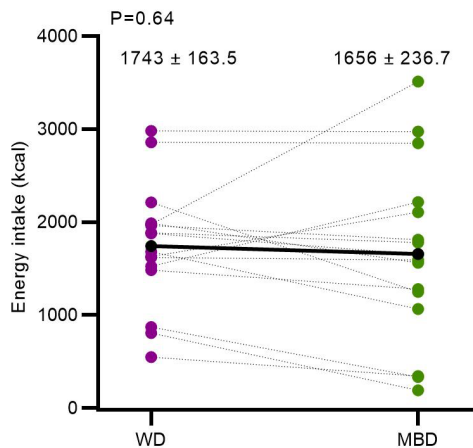

243

244 **Supplementary Fig. 6. Host response to dietary intervention.** **a**, Gastric emptying as evaluated by  
 245 acetaminophen appearance after a fixed breakfast. **b**, pH within a 1-hour window of the ileocecal passage. **c-g**,  
 246 Visual analog scale data for subjective ratings of fullness, hunger, prospective food consumption, satiety and a  
 247 composite appetite score. **h**, Ad libitum energy intake evaluated during lunch and dinner after a fixed breakfast.  
 248 All data reported as mean ± s.e.m. N=17 per diet for panels a and b; n=16 per diet for panels c-h. All error bars  
 249 are displayed as s.e.m. P values for all panels are from linear mixed effects regression models and denote the  
 250 effect of diet (or lack thereof) on each endpoint. MBD—Microbiome Enhancer Diet (green); WD—Western  
 251 Diet (purple)

252

## Supplementary Fig. 7

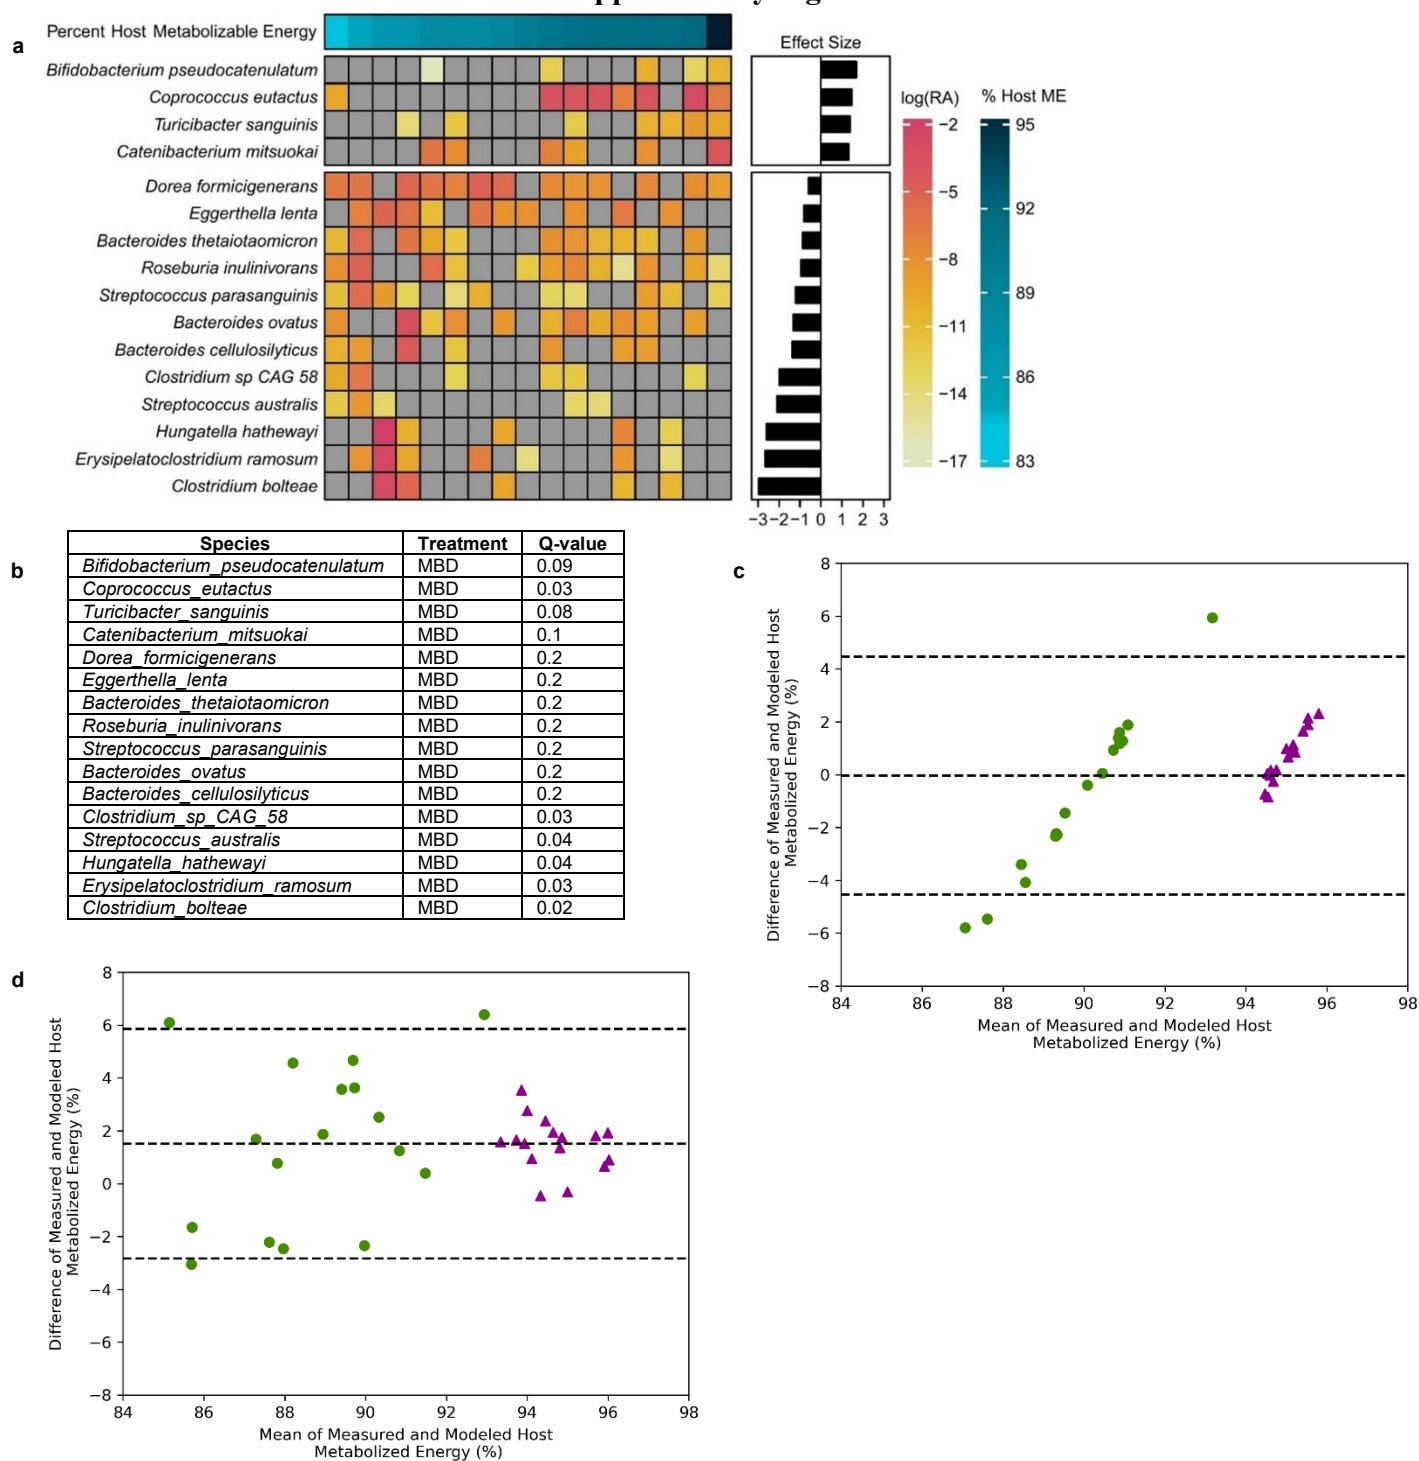

**Supplementary Fig. 7 Microbial contributions to host energy balance.** **a**, The heatmap shows the associations between host ME and mean natural-log-transformed relative abundance of each species (MaAsLin2). Each row is a species and each column is an individual participant. The bar graph shows the effect size of the regression coefficient between the independent variable of host metabolizable energy and each species, from compound Poisson regression models ( $Q < 0.25$ ) **b**, P-values were correct to produce Q-values using the Benjamini-Hochberg method, for the regression coefficients shown in **a**, for each species (range 0.023 - 0.198). **c**, Bland-Altman plot comparing measured host metabolizable energy vs. modeled using a fixed CTT of 48 h. **d**, Bland-Altman plot comparing actual host metabolizable energy vs. modeled using the measured CTT for each participant. N=17 per diet for all panels. COD—chemical oxygen demand; Green—Western Diet; ME—metabolizable energy; Purple—Microbiome Enhancer Diet; RA—relative abundance

287 **References**

- 288 1 Murphy, M. M., Douglass, J. S. & Birkett, A. Resistant starch intakes in the United States. *Journal of*  
289 *the American Dietetic Association* **108**, 67-78, doi:10.1016/j.jada.2007.10.012 (2008).
- 290 2 Lewis, S. J. & Heaton, K. W. Stool form scale as a useful guide to intestinal transit time. *Scand J*  
291 *Gastroenterol* **32**, 920-924, doi:10.3109/00365529709011203 (1997).

292
